# Supplementary material for: Emerging investigator series: heterogeneous reactions of sulfur dioxide on mineral dust nanoparticles: from single component to mixed components
Source: Royal Society of Chemistry journal article supplement (doi:10.1039/c8en00376a), 2018-01-01
Supplement: c8en00376a1.pdf [file c8en00376a1.pdf]

# Supporting information

*for*

## Heterogeneous reaction of sulfur dioxide on mineral dust nanoparticles: from single component to mixed components

Tao Wang<sup>1</sup>, Yangyang Liu<sup>1</sup>, Yue Deng<sup>1</sup>, Hongbo Fu<sup>1</sup>, Liwu Zhang<sup>1,2\*</sup>, Jianmin Chen<sup>1</sup>

<sup>1</sup>Shanghai Key Laboratory of Atmospheric Particle Pollution and Prevention, Department of  
Environmental Science & Engineering, Fudan University, Shanghai, 200433, Peoples' Republic of  
China

<sup>2</sup>Shanghai Institute of Pollution Control and Ecological Security, Shanghai, 200092, Peoples'  
Republic of China

\*Corresponding Author: Liwu Zhang ([zhanglw@fudan.edu.cn](mailto:zhanglw@fudan.edu.cn))

Number of pages: 14

Number of figures: 12

Number of tables: 4

Number of equations: 3

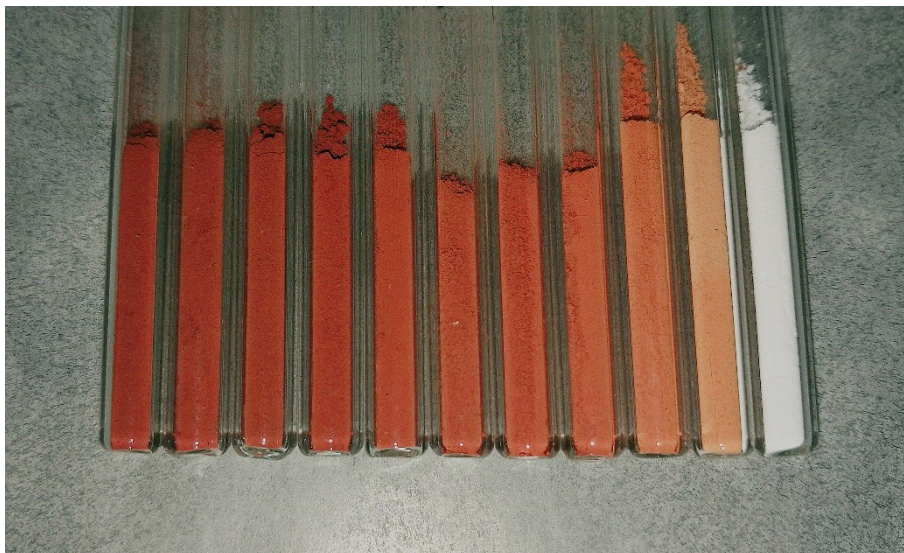

**Figure S1.** Hematite-alumina mixtures after grinding preparations.

(From left to right, HA-100 to HA-0)

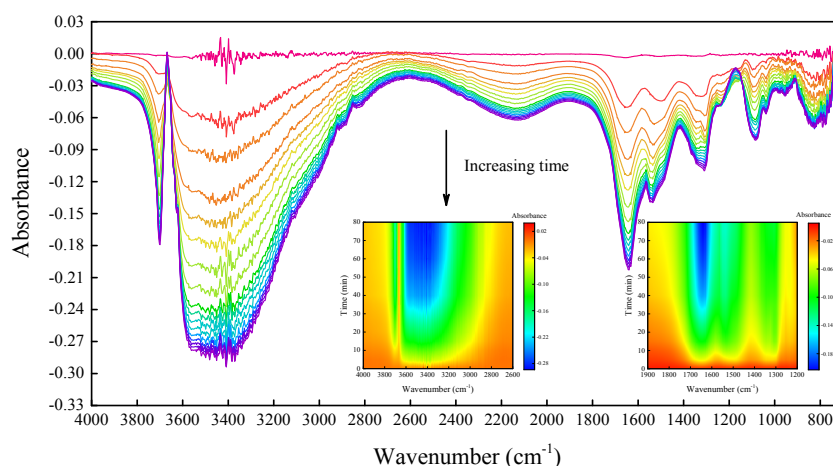

**Figure S2.** DRIFTS spectra of hematite during pretreatment process.

Before the introduction of  $\text{SO}_2$  into the DRIFTS chamber, each sample was pretreated in a stream of high-pure air with a flow of  $100 \text{ ml} \cdot \text{min}^{-1}$  for 60 min to blow off water and impurities on sample surfaces. A background was recorded before the pretreatment, and then a series of spectra were collected every five minutes.

Negative peaks located at  $3701$  and  $1643 \text{ cm}^{-1}$ , as well as the broad bands between  $3650$ - $2900 \text{ cm}^{-1}$  and centered at  $2100 \text{ cm}^{-1}$  are totally attributed to the vibrations of O-H groups. In detail, the peaks centered at  $1643$  and  $2100 \text{ cm}^{-1}$  are both assigned to liquid water,<sup>1-3</sup> whereas the others are characteristics of diverse surface hydroxyl groups.<sup>4-6</sup> Carbonate species formed during sample preparations significantly decreased, as evident by the successive peaks around  $1539$ ,  $1310$  and  $1084 \text{ cm}^{-1}$ .<sup>7, 8</sup> All the peaks declined over time and then gradually became stable after 45 min. The spectra of all the mixtures are roughly the same. Therefore, 60 min pretreatment was employed in each experiment.

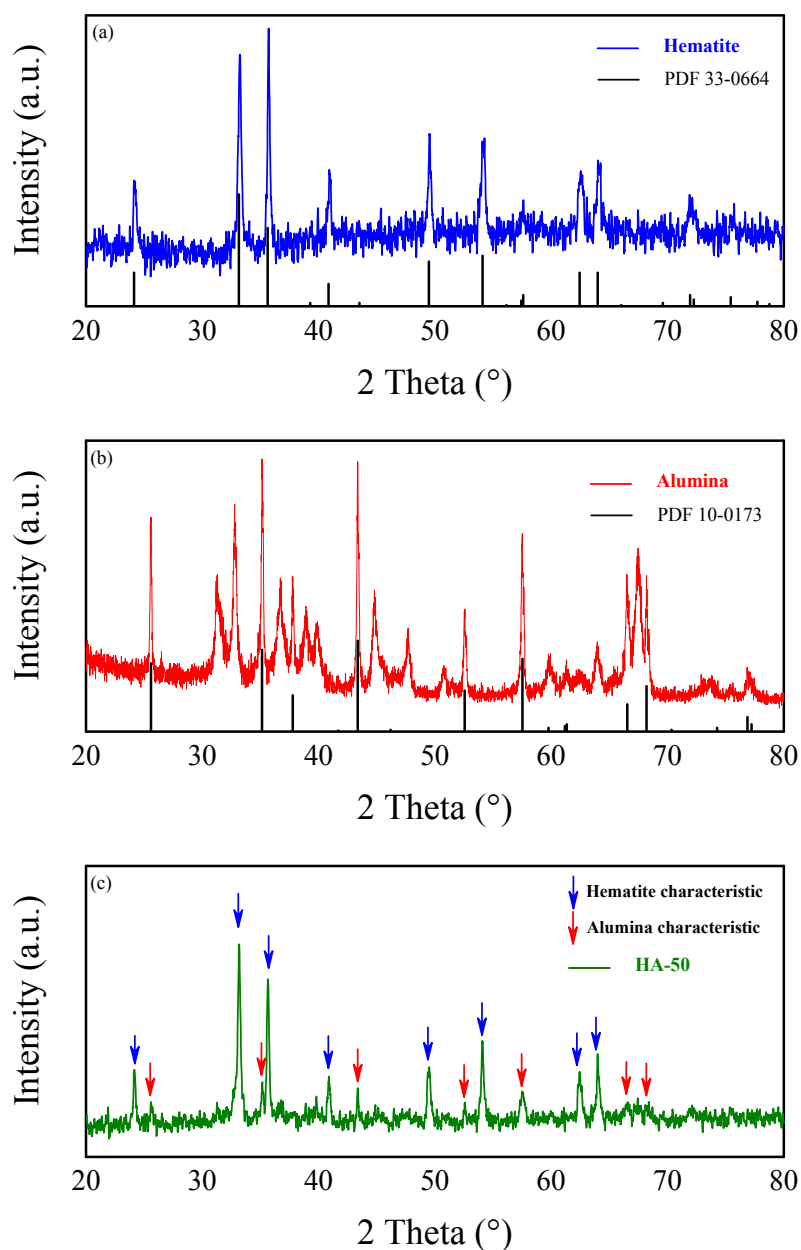

**Figure S3.** XRD patterns of the (a) laboratory prepared hematite, (b) purchased alumina, and (c) HA-50 mixture. All samples were manually grinded before XRD analysis.

X-ray diffraction (XRD) patterns of the two oxides match well to the standard Joint Committee on Powder Diffraction Standards (JCPDS) Cards of iron oxide (PDF 33-0664) and corundum (PDF 10-0173), respectively.

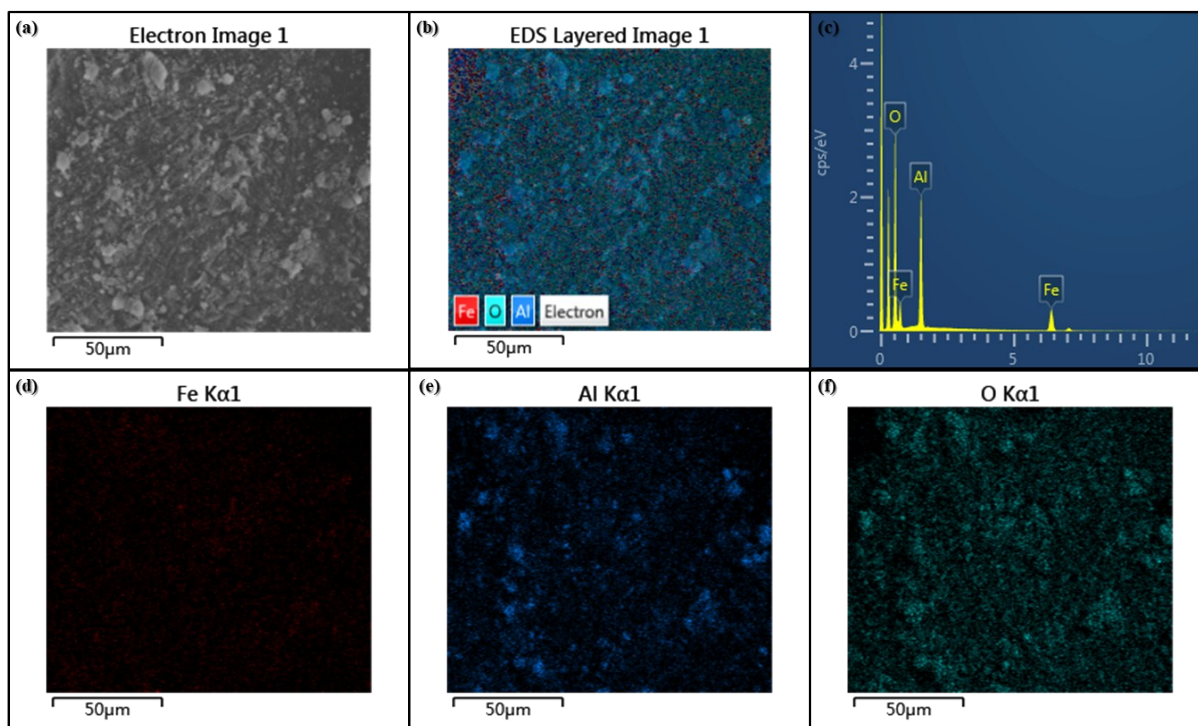

**Figure S4.** SEM-EDX mapping detection for HA-50 sample: (a) SEM image, (b) element distribution on the selected sample surface, (c) EDX results, as well as detailed element distribution of (d) iron, (e) alumina, and (f) oxygen.

The homogeneous distribution of iron and alumina elements indicates the thorough mixing of the two metal oxides.

76 **Table S1.** BET specific surface area ( $S_{\text{BET}}$ ), pore volume and pore size of the hematite-alumina mixtures

| Hematite (%) | $S_{\text{BET}}$ ( $\text{m}^2\cdot\text{g}^{-1}$ ) | Pore volume ( $\text{cm}^3\cdot\text{g}^{-1}$ ) | Pore size ( $\text{nm}^2$ ) |
|--------------|-----------------------------------------------------|-------------------------------------------------|-----------------------------|
| 0            | <b>46.97</b>                                        | 0.251                                           | 21.335                      |
| 10           | <b>46.19</b>                                        | 0.252                                           | 21.705                      |
| 20           | <b>45.37</b>                                        | 0.249                                           | 21.954                      |
| 30           | <b>43.41</b>                                        | 0.243                                           | 22.157                      |
| 40           | <b>41.65</b>                                        | 0.236                                           | 22.387                      |
| 50           | <b>39.66</b>                                        | 0.226                                           | 22.720                      |
| 60           | <b>37.42</b>                                        | 0.217                                           | 23.227                      |
| 70           | <b>34.60</b>                                        | 0.207                                           | 23.984                      |
| 80           | <b>32.23</b>                                        | 0.199                                           | 25.064                      |
| 90           | <b>29.27</b>                                        | 0.193                                           | 26.542                      |
| 100          | <b>26.23</b>                                        | 0.190                                           | 28.491                      |

77

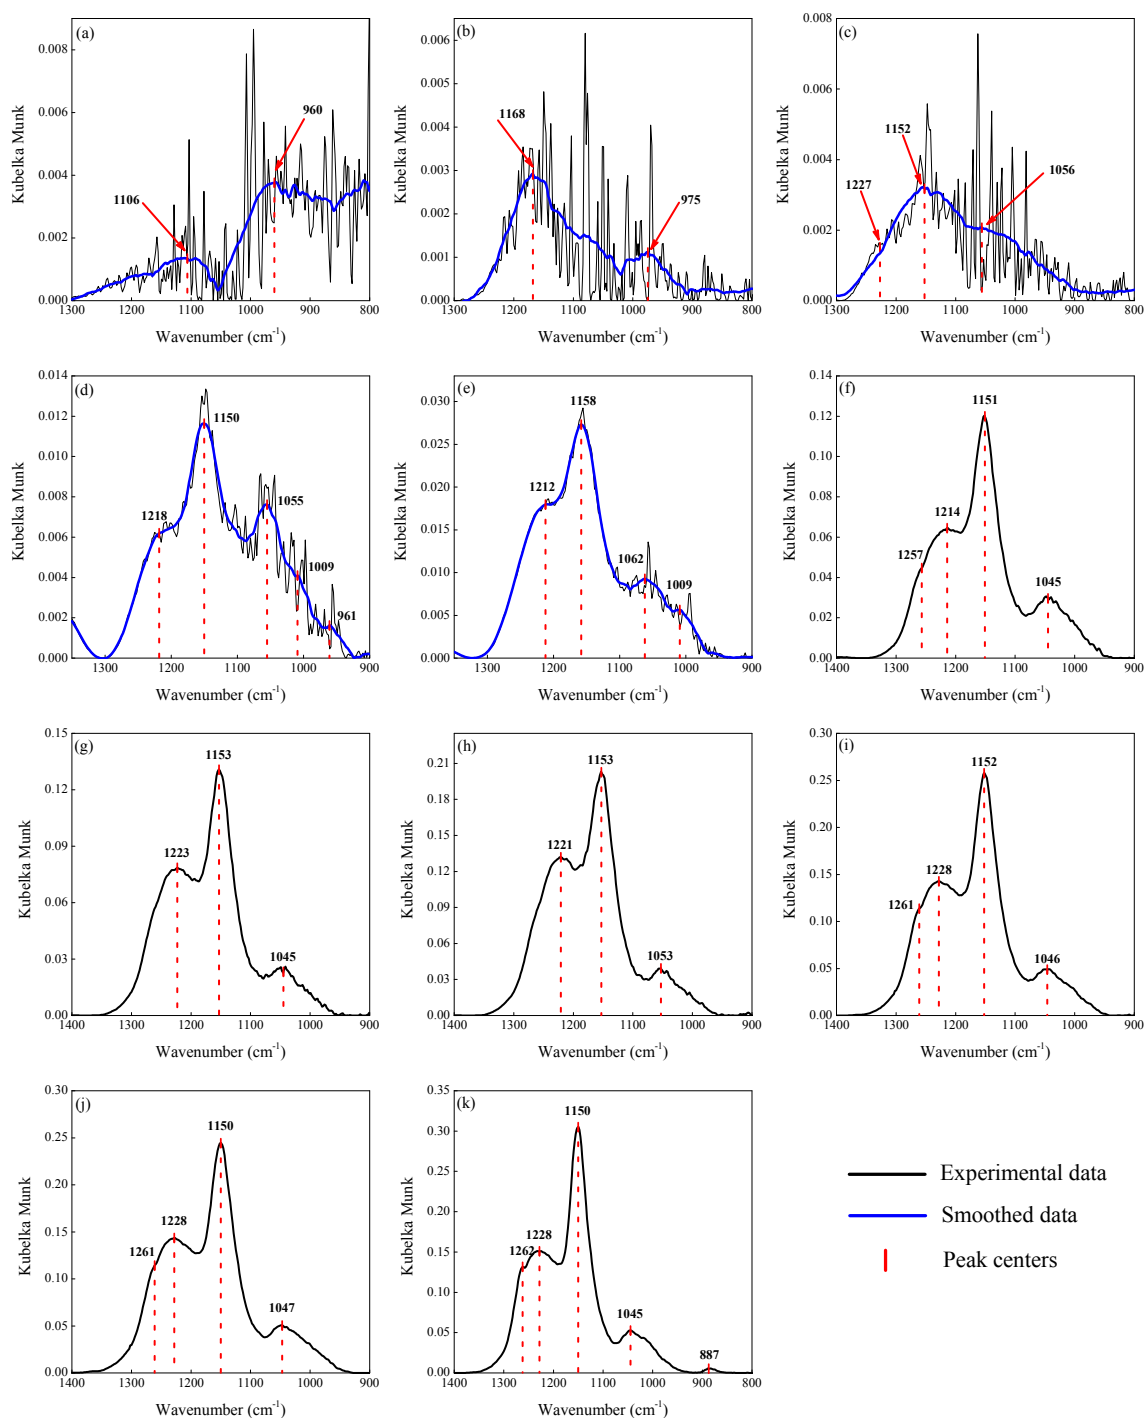

**Figure S5.** DRIFTS spectra of hematite-alumina mixtures after 60 min exposure to SO<sub>2</sub>-containing high-pure air. From a to k: mixtures from HA-0 to HA-100.

Smoothing processes were employed for the spectra of HA-0, HA-10, HA-20, HA-30 and HA-40, owing to the strong lattice oxide absorptions of alumina.<sup>3</sup>

84

**Table S2.** Parameters for uptake coefficient calculations

| Parameter (unit)                                                 | Value                                                                                                                                                                 |
|------------------------------------------------------------------|-----------------------------------------------------------------------------------------------------------------------------------------------------------------------|
| Sulfate formation rate: $d[SO_4^{2-}]/dt$ (ion·s <sup>-1</sup> ) | According to reactions                                                                                                                                                |
| Particle reactive surface area: $A_s$ (m <sup>2</sup> )          | $A_{BET}$ (m <sup>2</sup> )<br>$A_{geo}$ (m <sup>2</sup> )                                                                                                            |
|                                                                  | $S_{BET} \times \text{sample mass}$<br>$1.96 \times 10^{-5}$                                                                                                          |
| Reactant concentration: $[SO_2]$ (molecule·m <sup>-3</sup> )     | $1.15 \times 10^{20}$                                                                                                                                                 |
| Velocity of molecule: $v_{SO_2}$                                 | Gas constant: $R$ (J·mol <sup>-1</sup> ·K <sup>-1</sup> )<br>Temperature: $T$ (Kelvin)<br>Molar mass: $M_{SO_2}$ (kg·mol <sup>-1</sup> )<br>Pi: $\pi$ (dimensionless) |
|                                                                  | 8.314<br>298<br>$6.4 \times 10^{-2}$<br>3.1416                                                                                                                        |

85

86

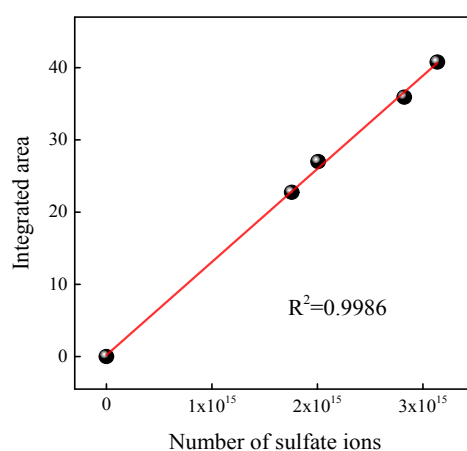

87

**Figure S6.** Calibration plot with numbers of  $SO_4^{2-}$  versus corresponding integrated areas for sulfate products on hematite.

A conversion is obtained from a calibration plot with the number of  $SO_4^{2-}$  analyzed by IC versus the integrated areas for sulfate products on hematite. Ultrapure water (5 ml, specific resistance  $\geq 18.2$  M $\Omega$  cm) containing 1% formaldehyde was used as extraction solvent to prevent oxidation processes. A spectral peak-fitting program using Gaussian-Lorentzian peak fitting was employed to the product spectra, and the integrated areas of sulfate peaks were calculated.

95

96

97

98

99



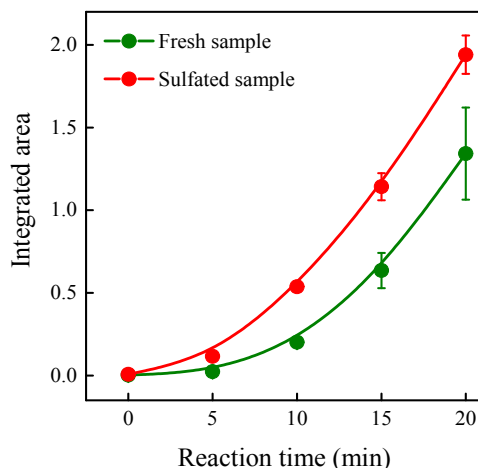

**Figure S7.** Integrated areas for sulfur-containing products on fresh (green) and sulfated HA-50 (red).

For fresh sample, product formation rate is relatively low in the beginning, resulting probably from the initial diffusion of  $\text{SO}_2$  on particle surfaces. The formation rate for sulfated sample (after 20 min in-situ exposure to  $\text{SO}_2$ ) is much higher than that for fresh nanoparticles.

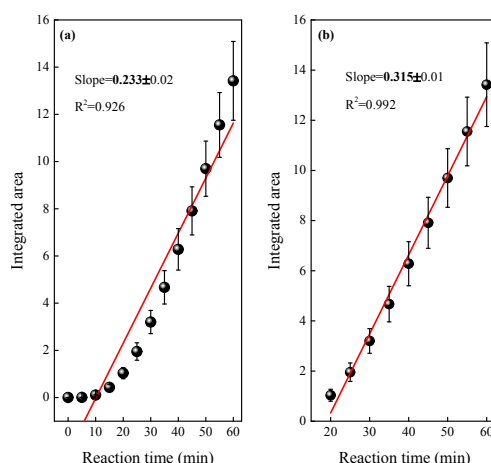

**Figure S8.** Linear fitting of product integrated areas during different reaction episodes: (a) 0-60 min; (b) 20-60 min. Take HA-50 as an example.

After being introduced to the DRIFTS chamber, some  $\text{SO}_2$  molecules diffuse to the nanoparticle surface, resulting in the slow product formation rate in the initial episode (0-20 min). Therefore, for the scatter diagram of product integrated areas as a function of time, the slope and  $R^2$  value of fitted curve become larger if the initial episode is not involved. Uptake coefficients for the whole polluted period (0-60 min) may underestimate the real reactive capacity. To reveal the actual and steady process of  $\text{SO}_2$  oxidation, only the latter 40 minutes (20-60 minutes) is involved in the uptake coefficient calculations.

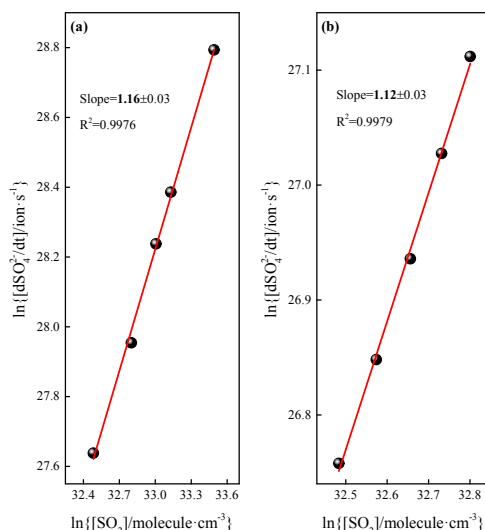

**Figure S9.** Bilogarithmic plots of the product formation rates versus corresponding  $SO_2$  concentrations for two studied samples: (a) HA-100; (b) HA-50.

In this study, formation rate of sulfur-containing compounds is related to  $SO_2$  concentration, number of active sites on mixture surfaces, and  $O_2$  concentration, which could be shown by **equation S1** based on the law of mass action.<sup>9, 10</sup>

$$d[SO_4^{2-}]/dt = k[SO_2]^m[Mixture]^n[O_2]^p \quad Eq.S1$$

Where  $[SO_4^{2-}]$  is the concentration of products,  $[SO_2]$  is the concentration of  $SO_2$ ,  $[Mixture]$  is the concentration of active sites on mixture surfaces,  $[O_2]$  is the concentration of  $O_2$ ,  $m$ ,  $n$ ,  $p$  are the reaction orders of  $SO_2$ , active site and  $O_2$ , respectively. Oxygen is sufficient for the oxidation processes.<sup>11</sup> No saturation effects on the formation of sulfur-containing products were observed, and thus the  $[Mixture]$  is approximately constant.<sup>6</sup> Hence, the product formation rate is largely relative to  $SO_2$  concentration. As reported previously, the reaction order here is determined by double-logarithmic plots of the formation rates versus the  $SO_2$  concentrations based on **equation S2**.<sup>6, 12, 13</sup>

$$\ln(d[SO_4^{2-}]/dt) = m\ln[SO_2] + n\ln[Mixture] + p\ln[O_2] + \ln k \quad Eq.S2$$

The reaction order for HA-100 and HA-50 are 1.16 and 1.12, respectively, both indicating the reaction order of 1 for  $SO_2$ . Therefore, the heterogeneous uptake of  $SO_2$  on hematite-alumina mixture can be viewed as pseudo-first-order reaction.

134

135 **Table S3.** Summary of uptake coefficients for the heterogeneous reactions of SO<sub>2</sub> on hematite-alumina  
136 mixtures

| Hematite (%) | $\gamma_{\text{BET}}$                           | $\gamma_{\text{geo}}$                         |
|--------------|-------------------------------------------------|-----------------------------------------------|
| 0            | $7.37 \times 10^{-13} \pm 2.73 \times 10^{-13}$ | $3.42 \times 10^{-8} \pm 1.44 \times 10^{-8}$ |
| 10           | $1.18 \times 10^{-12} \pm 1.05 \times 10^{-13}$ | $7.56 \times 10^{-8} \pm 1.61 \times 10^{-8}$ |
| 20           | $1.47 \times 10^{-12} \pm 8.93 \times 10^{-15}$ | $9.12 \times 10^{-8} \pm 2.58 \times 10^{-9}$ |
| 30           | $3.96 \times 10^{-12} \pm 7.07 \times 10^{-13}$ | $2.49 \times 10^{-7} \pm 5.36 \times 10^{-8}$ |
| 40           | $9.08 \times 10^{-12} \pm 2.60 \times 10^{-14}$ | $6.57 \times 10^{-7} \pm 2.51 \times 10^{-8}$ |
| 50           | $3.31 \times 10^{-11} \pm 3.10 \times 10^{-12}$ | $2.30 \times 10^{-6} \pm 2.58 \times 10^{-7}$ |
| 60           | $4.64 \times 10^{-11} \pm 1.46 \times 10^{-12}$ | $2.80 \times 10^{-6} \pm 1.12 \times 10^{-7}$ |
| 70           | $7.34 \times 10^{-11} \pm 4.65 \times 10^{-12}$ | $4.29 \times 10^{-6} \pm 1.60 \times 10^{-7}$ |
| 80           | $8.53 \times 10^{-11} \pm 3.59 \times 10^{-13}$ | $5.15 \times 10^{-6} \pm 8.74 \times 10^{-8}$ |
| 90           | $8.87 \times 10^{-11} \pm 6.21 \times 10^{-12}$ | $5.20 \times 10^{-6} \pm 2.66 \times 10^{-7}$ |
| 100          | $9.00 \times 10^{-11} \pm 6.68 \times 10^{-12}$ | $5.68 \times 10^{-6} \pm 4.14 \times 10^{-7}$ |

137

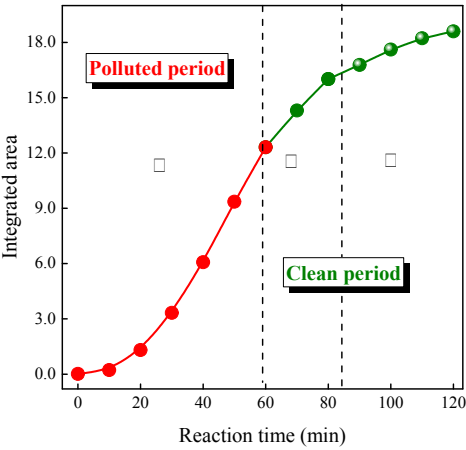

138

139 **Figure S10.** Integrated areas for sulfur-containing products during polluted period ( I ), clean period ( II ),  
140 and clean period with the DRIFTS chamber closed (III).

141 The experiment including three steps is aimed at verifying the sources of sulfur-containing products in  
142 clean period.

143 I. Sulfur-containing species were formed on HA-50 along with the introduction of SO<sub>2</sub> in polluted  
144 period.

145 II. SO<sub>2</sub> was cut off and only high-pure air (100 ml·min<sup>-1</sup>) was introduced for 25 min. The calculated air  
146 volume (2500 ml) is 1000 times more than that of the DRIFTS chamber (2.5×10<sup>-5</sup> m<sup>3</sup>). Hence, the  
147 chamber was washed for about 1000 times and could be considered clean.<sup>14</sup> The process is mainly  
148 aimed at thoroughly flowing away the residual SO<sub>2</sub> in gas supply system and reaction chamber. Prior

research has found the extremely low adsorption capacity of the DRIFTS chamber.<sup>8</sup>

III. Pure air flux was also cut off and then the inlet and the outlet of the chamber were closed. The reaction only proceeded in a closed environment. Formation still occurred during this period.

Therefore, sulfur-containing species formed during clean period originate primarily from the SO<sub>2</sub> physically adsorbed on mixtures in polluted period, rather than the residual SO<sub>2</sub> in gas supply system and/or DRIFTS chamber.

**Table S4.** Sulfate yields on hematite-alumina mixtures in polluted and clean periods

| Hematite (%) | Polluted period                              |                                        |         | Clean period                                 |                                        |         |
|--------------|----------------------------------------------|----------------------------------------|---------|----------------------------------------------|----------------------------------------|---------|
|              | Y <sub>ma</sub> (ion·g <sup>-1</sup> )       | Y <sub>st</sub> (ion·g <sup>-1</sup> ) | Dev     | Y <sub>ma</sub> (ion·g <sup>-1</sup> )       | Y <sub>st</sub> (ion·g <sup>-1</sup> ) | Dev     |
| 0            | 1.11×10 <sup>15</sup> ±4.82×10 <sup>14</sup> |                                        | 0.0 %   | 7.10×10 <sup>14</sup> ±1.21×10 <sup>15</sup> |                                        | 0.0 %   |
| 10           | 1.50×10 <sup>15</sup> ±5.50×10 <sup>12</sup> | 6.68×10 <sup>15</sup>                  | -77.6 % | 9.95×10 <sup>14</sup> ±1.38×10 <sup>14</sup> | 1.73×10 <sup>15</sup>                  | -42.4 % |
| 20           | 1.84×10 <sup>15</sup> ±7.88×10 <sup>13</sup> | 1.22×10 <sup>16</sup>                  | -85.0 % | 1.14×10 <sup>15</sup> ±3.90×10 <sup>14</sup> | 2.74×10 <sup>15</sup>                  | -58.5 % |
| 30           | 4.33×10 <sup>15</sup> ±7.23×10 <sup>14</sup> | 1.78×10 <sup>16</sup>                  | -75.7 % | 3.14×10 <sup>15</sup> ±3.38×10 <sup>14</sup> | 3.76×10 <sup>15</sup>                  | -16.4 % |
| 40           | 8.61×10 <sup>15</sup> ±1.25×10 <sup>13</sup> | 2.34×10 <sup>16</sup>                  | -63.1 % | 6.79×10 <sup>15</sup> ±6.25×10 <sup>14</sup> | 4.77×10 <sup>15</sup>                  | 42.4 %  |
| 50           | 3.03×10 <sup>16</sup> ±3.21×10 <sup>15</sup> | 2.89×10 <sup>16</sup>                  | 4.6 %   | 1.01×10 <sup>16</sup> ±1.53×10 <sup>15</sup> | 5.79×10 <sup>15</sup>                  | 74.6 %  |
| 60           | 4.15×10 <sup>16</sup> ±1.35×10 <sup>15</sup> | 3.45×10 <sup>16</sup>                  | 20.2 %  | 1.04×10 <sup>16</sup> ±1.42×10 <sup>15</sup> | 6.80×10 <sup>15</sup>                  | 52.5 %  |
| 70           | 6.15×10 <sup>16</sup> ±4.14×10 <sup>15</sup> | 4.01×10 <sup>16</sup>                  | 53.5 %  | 1.15×10 <sup>16</sup> ±1.01×10 <sup>15</sup> | 7.82×10 <sup>15</sup>                  | 47.1 %  |
| 80           | 6.62×10 <sup>16</sup> ±1.30×10 <sup>14</sup> | 4.56×10 <sup>16</sup>                  | 45.1 %  | 1.16×10 <sup>16</sup> ±8.14×10 <sup>14</sup> | 8.83×10 <sup>15</sup>                  | 31.4 %  |
| 90           | 6.20×10 <sup>16</sup> ±4.37×10 <sup>15</sup> | 5.12×10 <sup>16</sup>                  | 21.2 %  | 1.19×10 <sup>16</sup> ±1.33×10 <sup>15</sup> | 9.85×10 <sup>15</sup>                  | 21.2 %  |
| 100          | 5.68×10 <sup>16</sup> ±4.01×10 <sup>15</sup> |                                        | 0.0 %   | 1.09×10 <sup>16</sup> ±7.26×10 <sup>14</sup> |                                        | 0.0 %   |

Deviation (Dev) is calculated in this study based on equation S3 to present the gaps between Y<sub>ma</sub> and corresponding Y<sub>st</sub>.

$$Dev = \frac{(Y_{ma} - Y_{st})}{Y_{st}} \times 100\% \quad Eq.S3$$

170

171

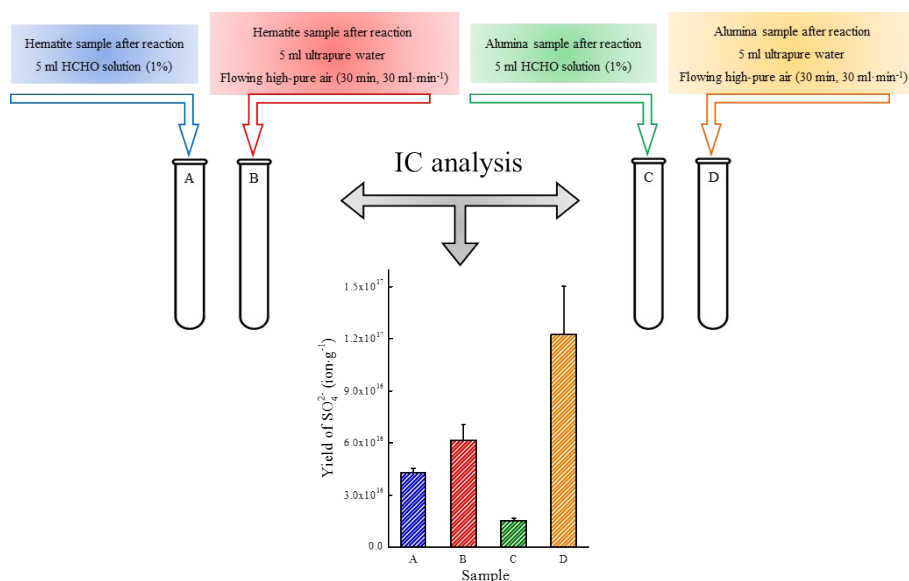

172

173 **Figure S11.** Oxidation of adsorbed  $\text{SO}_2$  and sulfite products.

174 As described in **Figure S10**, a series of experiments were carried out to confirm the physical  
 175 adsorption of  $\text{SO}_2$  on the nanoparticle surface. Each sample was exposed to  $\text{SO}_2$  (4.686 ppm) for 50  
 176 minutes under dry condition before IC analysis. HCHO solution or high-pure air were introduced to the  
 177 extraction solutions to prevent or accelerate oxidation processes, respectively. Blank experiments for  
 178 unreacted samples were considered. The sulfate yields of sample A, B, C and D are denoted as  $Y_A$ ,  $Y_B$ ,  $Y_C$   
 179 and  $Y_D$ , respectively.

180  $Y_B$  is higher than  $Y_A$ , and  $Y_D$  is higher than  $Y_C$ , both suggesting the oxidation of sulfite species. Due  
 181 to the great capacity of hematite in the heterogeneous oxidation of  $\text{SO}_2$  to sulfate products,  $Y_A$  is  
 182 significantly higher than  $Y_C$ . Note that,  $Y_D$  is extremely higher than  $Y_B$  although the integrated area for the  
 183 total sulfur-containing products on alumina after 60 min  $\text{SO}_2$  exposure is much lower than that on hematite  
 184 (**Figure S4**). It has been confirmed that physisorbed and chemisorbed  $\text{SO}_2$  (surface-coordinated sulfite) are  
 185 formed after interactions of  $\text{SO}_2$  with acid and base sites on  $\alpha\text{-Al}_2\text{O}_3$  surfaces, respectively.<sup>12, 15, 16</sup> Hence,  
 186 the gap between  $Y_C$  and  $Y_D$  is attributed not only to sulfite oxidation, but also the oxidation of large amount  
 187 of physically adsorbed  $\text{SO}_2$  on alumina inner surfaces. As amphoteric metal oxide with relative large  $S_{\text{BET}}$   
 188 and pore volume (**Table S1**), alumina contains many effective acid sites. As basic metal oxide, hematite  
 189 contains few acid sites on surfaces, which makes  $\text{SO}_2$  physical adsorption difficult.

190

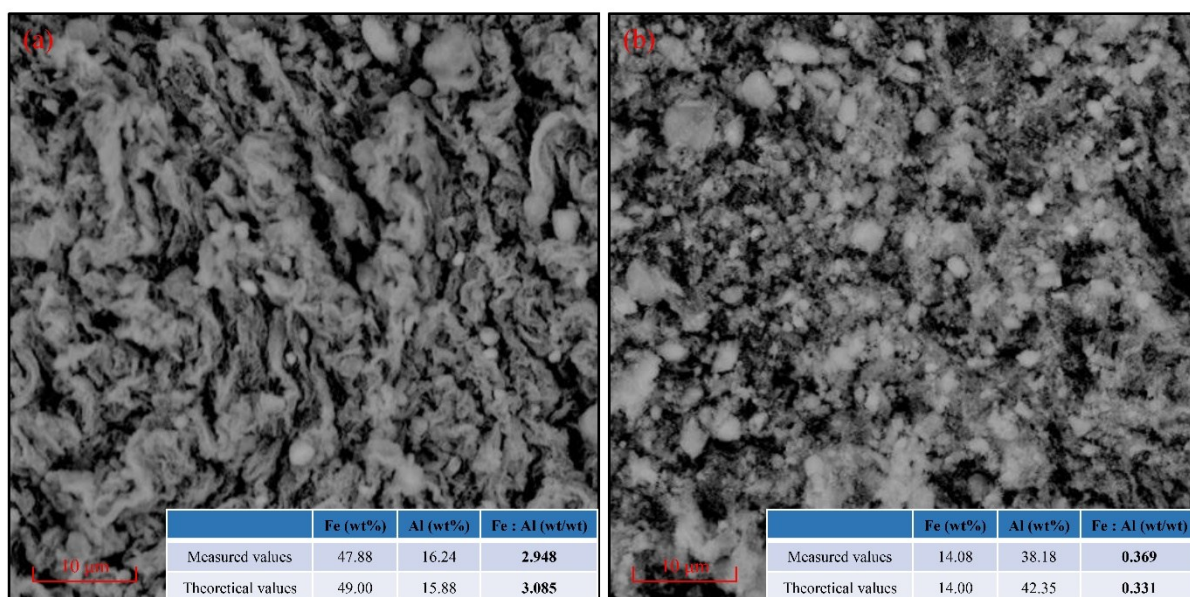

**Figure S12.** EDX-mapping images of (a) HA-70 and (b) HA-20.

Mapping results from a Phenom XL scanning electron microscope equipped with an energy-dispersive X-ray spectrometer (SEM-EDX) present the mass fractions (%) of Fe and Al in the surface layers of HA-70 and HA-20. There are no significant differences between measured and theoretical values. The hematite proportions of HA-70 and HA-20 calculated by EDX-mapping results are 69.0% and 21.8%, respectively, excluding the possibility of compact surface coating.

## References

- 1 Y. Zhao, Y. Liu, J. Ma, Q. Ma and H. He, *Atmospheric Environment*, 2017, 152, 465-476.
- 2 H. A. Al-Abadleh and V. H. Grassian, *Langmuir*, 2003, 19, 341-347.
- 3 Q. Ma, H. He and Y. Liu, *Journal of Environmental Sciences*, 2010, 22, 555-560.
- 4 C. Deiana, E. Fois, S. Coluccia and G. Martra, *The Journal of Physical Chemistry C*, 2010, 114, 21531-21538.
- 5 C. E. Nanayakkara, W. A. Larish and V. H. Grassian, *The Journal of Physical Chemistry C*, 2014, 118, 23011-23021.
- 6 L. D. Kong, X. Zhao, Z. Y. Sun, Y. W. Yang, H. B. Fu, S. C. Zhang, T. T. Cheng, X. Yang, L. Wang and J. M. Chen, *Atmospheric Chemistry and Physics*, 2014, 14, 9451-9467.
- 7 L. Mino, G. Spoto and A. M. Ferrari, *Journal of Physical Chemistry C*, 2014, 118, 25016-25026.
- 8 H. Chen, L. Kong, J. Chen, R. Zhang and L. Wang, *Environmental Science & Technology*, 2007, 41, 6484-6490.
- 9 J. Shang, J. Li and T. Zhu, *Science China Chemistry*, 2010, 53, 2637-2643.
- 10 J. Li, J. Shang and T. Zhu, *Science China Chemistry*, 2010, 54, 161-166.
- 11 H. Fu, X. Wang, H. Wu, Y. Yin and J. Chen, *The Journal of Physical Chemistry C*, 2007, 111, 6077-6085.
- 12 L. W. Wu, S. R. Tong, W. G. Wang and M. F. Ge, *Atmospheric Chemistry and Physics*, 2011, 11, 6593-6605.
- 13 W. Yang, J. Zhang, Q. Ma, Y. Zhao, Y. Liu and H. He, *Scientific Reports*, 2017, 7, 4550.
- 14 L. Wu, S. Tong, S. Hou and M. Ge, *Journal of Physical Chemistry A*, 2012, 116, 10390-10396.
- 15 A. L. Goodman, P. Li, C. R. Usher and V. H. Grassian, *The Journal of Physical Chemistry A*, 2001, 105, 6109-6120.
- 16 W. Yang, H. He, Q. Ma, J. Ma, Y. Liu, P. Liu and Y. Mu, *Physical Chemistry Chemical Physics*, 2015, 18, 956-964.
